# Supplementary material
Source: PubMed Central journal article supplement (PMC4136085)
Supplement: AEM.01644-14_zam999105621so1.pdf [file AEM.01644-14_zam999105621so1.pdf]

Primer Set 1:  
SSU-316F +  
G1TC758R

P-

| Species                                    | SSU-316F | G1TC758R |
|--------------------------------------------|----------|----------|
| <i>Dasytricha raminatum</i> US7976         |          |          |
| <i>Isotricha intermedia</i> US7976         |          |          |
| <i>Isotricha prostoma</i> AF025762         |          |          |
| <i>Entodinium bursa</i> AM158448           |          |          |
| <i>Entodinium caudatum</i> US7765          |          |          |
| <i>Entodinium deborae</i> AM158443         |          |          |
| <i>Entodinium simplex</i> AM158466         |          |          |
| <i>Entodinium longicaudatum</i> AB481099   |          |          |
| <i>Entodinium nanum</i> JX676651           |          |          |
| <i>Epidinium caudatum</i> US7763           |          |          |
| <i>Epidinium ecaudatum</i> AM158465        |          |          |
| <i>Eremolimax dilobum</i> AM158472         |          |          |
| <i>Eremolimax neglectum</i> AM158473       |          |          |
| <i>Eremolimax rotundum</i> AM158469        |          |          |
| <i>Eutopidium maggi</i> US7766             |          |          |
| <i>Ophryoxcolex caudatus</i> AM158467      |          |          |
| <i>Ophryoxcolex sarkisae</i> 9776          |          |          |
| <i>Ostracodinium gracile</i> AB55662       |          |          |
| <i>Ostracodinium ciliosum</i> AB73617      |          |          |
| <i>Polystarion multivesiculatum</i> US7767 |          |          |
| <i>Diplodinium detritum</i> US7764         |          |          |
| <i>Diplodactylon affine</i> AM158457       |          |          |
| <i>Enzootarion trifurcatum</i> AM158461    |          |          |
| <i>Enzootarion caudatum</i> AF794976       |          |          |
| <i>Blepharocysta curvicaulis</i> AB543184  |          |          |
| <i>Blepharocysta jukata</i> AB794975       |          |          |
| <i>Blepharocysta nigra</i> AB794975        |          |          |
| <i>Cercodinium minimum</i> AB794974        |          |          |
| <i>Octotrocha apiculata</i> AB794973       |          |          |
| <i>Bandelia nana</i> AB55712               |          |          |
| <i>Alloiozoa trilineata</i> AB795026       |          |          |
| <i>Blepharocysta hemisulcata</i> AB795027  |          |          |
| <i>Bandelia bicolor</i> AB55710            |          |          |
| <i>Bandelia nana</i> AB55712               |          |          |
| <i>Bandelia posticata</i> AB55709          |          |          |
| <i>Dicidionia ovalis</i> AB795025          |          |          |
| <i>Hemimastix asymmetrorum</i> AB795028    |          |          |
| <i>Parodinium col</i> AB795029             |          |          |
| <i>Sulcozoa pelliculosa</i> AB795024       |          |          |
| <i>Tetrazoium caudatum</i> AB794973        |          |          |
| <i>Tetrazoium parvum</i> AB794970          |          |          |
| <i>Ditium fulvicaudum</i> AB794991         |          |          |
| <i>Triadionium caudatum</i> AB50163        |          |          |
| <i>Trimeria setacea</i> AB539358           |          |          |
| <i>Boccalia sp</i> AB793714                |          |          |
| <i>Cyclospium bipalmatum</i> AM158165      |          |          |
| <i>Cyclospium edentatum</i> FE632077       |          |          |
| <i>Cyclospium ishikawae</i> FE632076       |          |          |
| <i>Trimeria digitifera</i> FE632074        |          |          |
| <i>Macropodium eumensis</i> AF298820       |          |          |
| <i>Macropodium yabense</i> AF298820        |          |          |
| <i>Amphioxys dichotoma</i> AF298821        |          |          |
| <i>Amphioxys digitifera</i> AF298822       |          |          |
| <i>Bandia crassa</i> AF298824              |          |          |
| <i>Bandia smoleae</i> AF298822             |          |          |
| <i>Bandia tasmaniensis</i> AF298821        |          |          |
| <i>Polycosta rowae</i> AF298819            |          |          |
| <i>Polycosta furcata</i> AF298818          |          |          |
| <i>Pentadionium sp.</i> AB531054           |          |          |
| <i>Polydella myzarea</i> AB55710           |          |          |
| <i>Pentadionium elaphense</i> AB794972     |          |          |
| <i>Cochlostoma perlatum</i> FE632078       |          |          |
| <i>Gossovskella goela</i> AB793978         |          |          |
| <i>Solidinium equi</i> AB794992            |          |          |
| <i>Topolofella abraensis</i> AB437346      |          |          |
| <i>Bolodinium crenopharyngium</i> GU480024 |          |          |
| <i>Bolodinium entoozum</i> EU681716        |          |          |
| <i>Neobolodinium col</i> AB794973          |          |          |
| <i>Helicostoma indicus</i> AB794981        |          |          |
| <i>Letterusia medea</i> AB794983           |          |          |
| <i>Letterusia polytricha</i> AB794982      |          |          |
| <i>Parastichia colidensis</i> FE632075     |          |          |
| <i>Parastichia minuta</i> AB794984         |          |          |
| <i>Buettneria sulcata</i> AB794979         |          |          |

Supplemental Figure 1: Genetic distance lower triangle showing pairwise comparisons of 18S rDNA gene for selected protists, using the amplicon length created with primer set 1: SSU-316F and G1TC758R.



Primer Set 3:  
GITC1184F +  
GITC1578R

Table with columns for species names and a grid of genetic data values. Species include Dasytricha raminantum, Isotricha adelaidae, Isotricha prostrata, Entodinium bursa, Entodinium caudatum, Entodinium dohrnii, Entodinium simplex, Entodinium longicaudatum, Entodinium marianum, Entodinium manganis, Entodinium nodosum, Entodinium pediforme, Entodinium rotatum, Entodinium maggi, Ophryoxcolex caudatus, Ophryoxcolex sarkisii, Ostrocodinium gracile, Ostrocodinium ciliosum, Polystroton multicristatum, Diplostroma dentatum, Diplostroma affine, Enzootroton trifurcatum, Bipharyxys caudata, Bipharyxys multicristata, Bipharyxys jurata, Bipharyxys nicholsonii, Bipharyxys mitchelli, Ciccodinium mitchelli, Ochotona apiculata, Baudinia delto, Baudinia trilineata, Baudinia hemicius, Baudinia bennettii, Baudinia mitchelli, Baudinia nova, Baudinia parvula, Sufococcus pelliculatus, Tetraodon caudatum, Tetraodon parvum, Dityum fulminatum, Dityum variatum, Dityum caudatum, Dityum mitchelli, Dityum novae, Cyclopodium bipalmatum, Cyclopodium edentatum, Cyclopodium ishikawa, Triodontia digitata, Cyclopodium emmersi, Macropodium yaboussi, Anzilivirus delphini, Baudinia cribra, Baudinia smielze, Baudinia tasmanica, Polycista roundi, Polycista furcata, Pentodontium sp, Polydella myzarea, Pentodontium nigrum, Cochlostomum perlatum, Gossovskella equi, Sapiodontium equi, Troglodytes abrotanii, Balaoidium crenospermum, Balaoidium entoonae, Neobalaoidium cili, Helicostium indicus, Lettauia media, Lettauia polytricha, Pantoniscia minuta, Balaonella sulcata.

Supplemental Figure 3: Genetic distance lower triangle showing pairwise comparisons of 18S rRNA gene for selected protistan species, using the amplicon length created with primers 3: GC1C184F and GC1C1578R.
